# Supplementary material
Source: MDPI journal article supplement (https://www.mdpi.com/2311-7524/10/4/340)
Supplement: s1 [file s1]

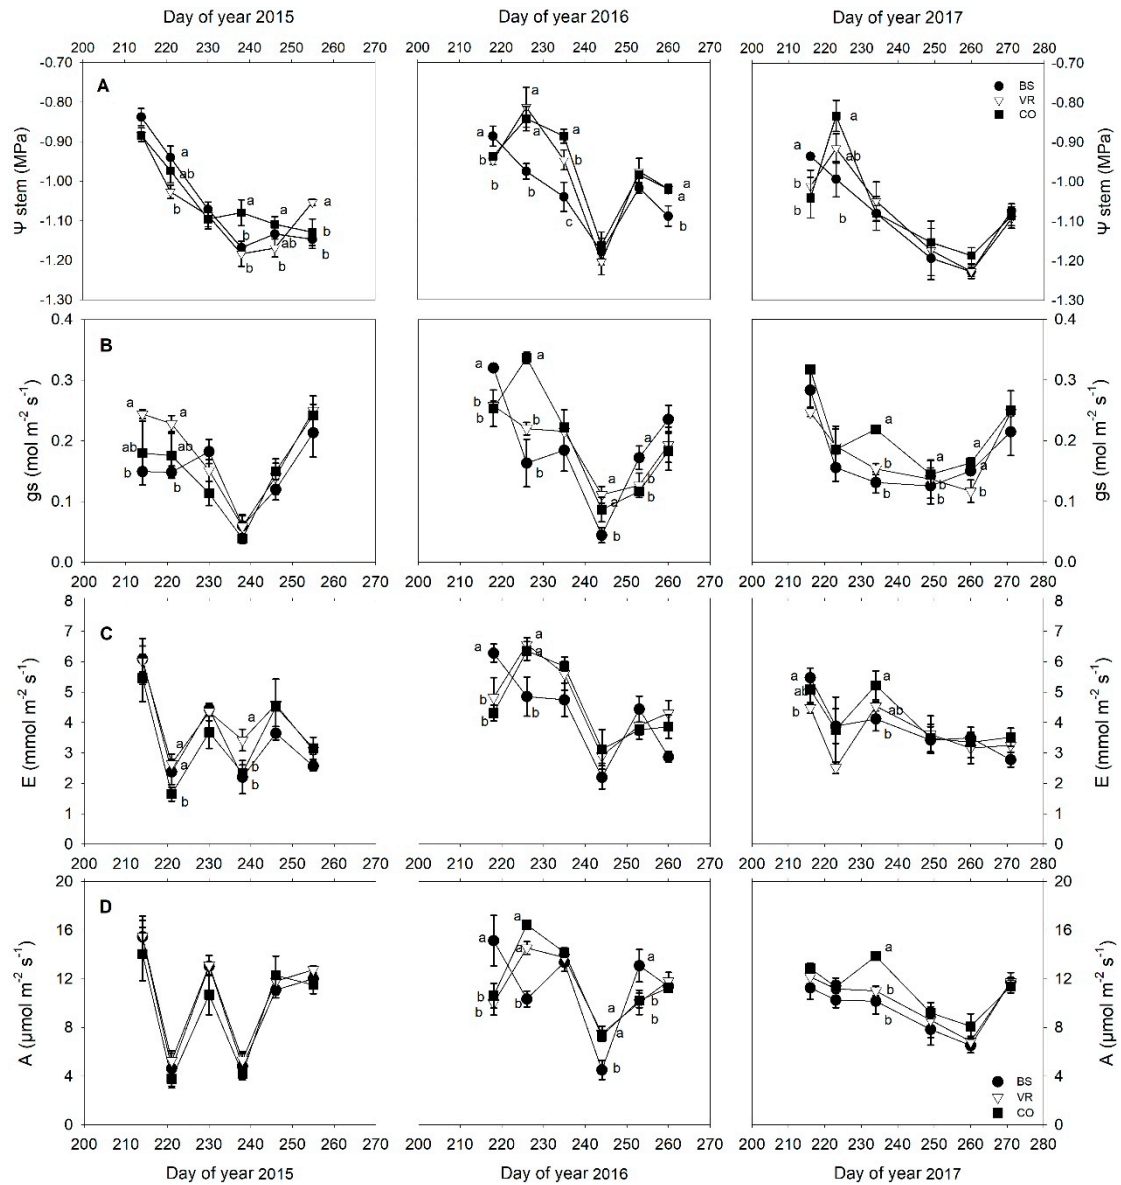

**Suppl. Figure S1.** Evolution of grapevine physiological parameters during ripening. A. stem water potential ( $\Psi_{\text{stem}}$ ) B. stomatal conductance ( $g_s$ ) C. evaporation ( $E$ ) D. net assimilation rate ( $A$ ). Vertical bars indicate the standard deviation of mean values ( $n=3$ ). Significant differences ( $p < 0.05$ ) among treatments within the same sampling day are indicated by different letters based on Duncan's test. BS, vines defoliated at berry set; VR, vines defoliated at veraison; CO, non-defoliated vines.

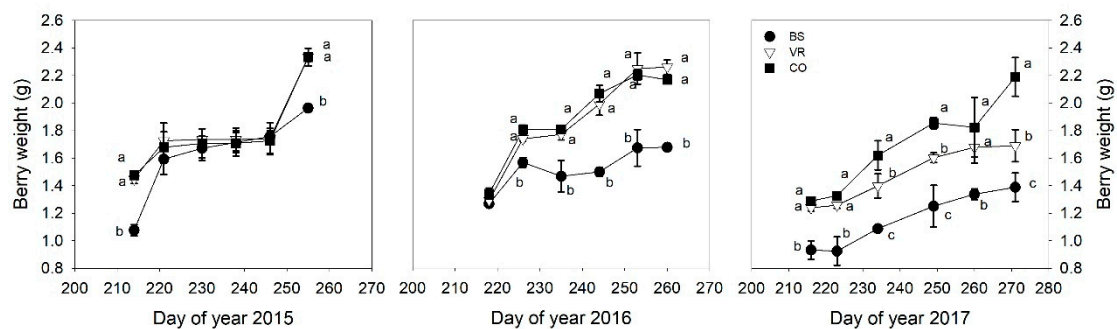

**Suppl. Figure S2.** Evolution of berry weight during ripening. Vertical bars indicate the standard deviation of mean values (n=3). Significant differences (p<0.05) among treatments within the same sampling day are indicated by different letters based on Duncan's test. BS, vines defoliated at berry set; VR, vines defoliated at veraison; CO, non-defoliated vines.

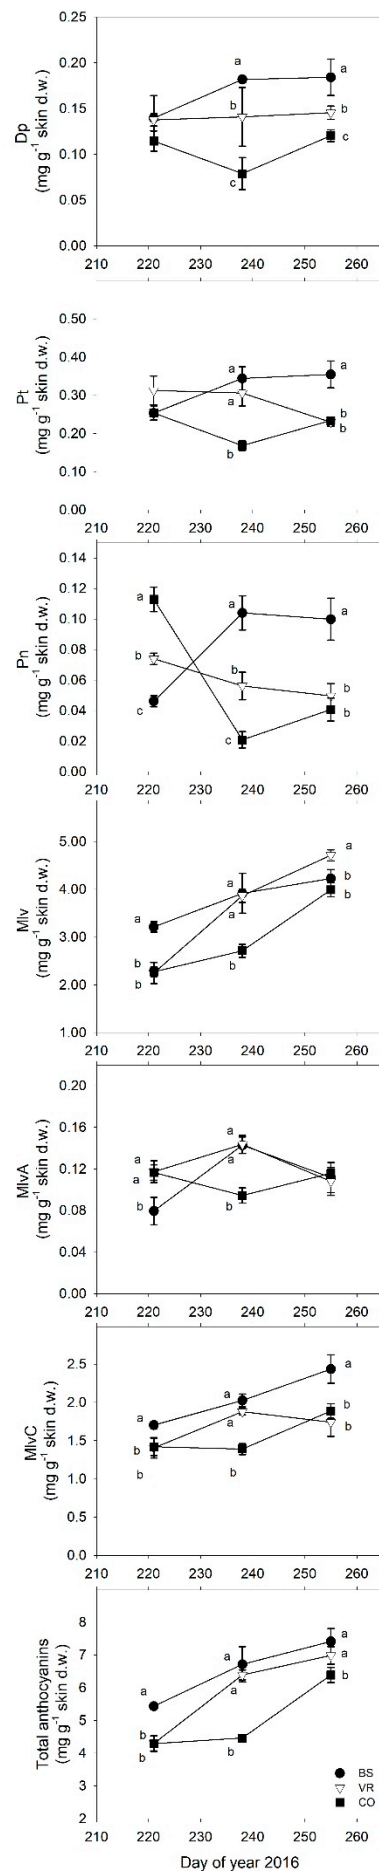

**Suppl. Figure S3.** Leaf removal effects on anthocyanin content in grape skins during ripening. Anthocyanins: delphinidin-3-O-glucoside (Dp), petunidin-3-O-glucoside (Pt), peonidin-3-O-glucoside (Pn), malvidin-3-O-glucoside (Mv), malvidin-3-O-acetylglucoside (MvA) and malvidin-3-(6-O-p-coumaroyl) glucoside (MvC). Significant differences ( $p < 0.05$ ) are indicated by different letters based on Duncan's test. BS, vines defoliated at berry set; VR, vines defoliated at veraison; CO, non-defoliated vines.

**Suppl. Table S1.** Leaf removal effects on yield parameters. Measurements presented were conducted at harvest ( $n=3$ ). Cluster compactness is the ratio of the number of berries per cluster and cluster length. Within each year and parameter, means followed by a different letter are significantly different at  $p < 0.05$  based on Duncan's test. BS: defoliated vines at berry set; VR: defoliated vines at veraison; CO: non-defoliated vines.

| Year | Treatment | Clusters/vine | Cluster Length<br>(cm) | Cluster Width<br>(cm) | Berry<br>number/cluster | Cluster compactness<br>(berries/cm) |
|------|-----------|---------------|------------------------|-----------------------|-------------------------|-------------------------------------|
| 2015 | BS        | 22.1 a        | 17.0                   | 10.1                  | 110 b                   | 6.5 b                               |
|      | VR        | 18.5 b        | 17.2                   | 10.6                  | 152 a                   | 8.8 a                               |
|      | CO        | 19.3 b        | 17.5                   | 10.0                  | 159 a                   | 9.2 a                               |
| 2016 | BS        | 19.0          | 16.0                   | 7.2                   | 102 b                   | 6.7 b                               |
|      | VR        | 18.0          | 15.7                   | 9.0                   | 142 a                   | 9.2 a                               |
|      | CO        | 18.0          | 16.2                   | 8.4                   | 146 a                   | 9.5 a                               |
| 2017 | BS        | 18.2          | 15.5                   | 10.4                  | 103 b                   | 6.8 b                               |
|      | VR        | 18.0          | 15.1                   | 9.8                   | 143 a                   | 9.6 a                               |
|      | CO        | 19.3          | 15.7                   | 10.4                  | 145 a                   | 9.7 a                               |
